# Supplementary material for: Tumor cell-intrinsic PD-L1 promotes tumor-initiating cell generation and functions in melanoma and ovarian cancer
Source: PubMed Central journal article supplement (PMC5547561; doi:10.1038/sigtrans.2016.30), 2016-12-23
Supplement: NIHMS873874-supplement-Suppl_figs_1-4.pdf [file NIHMS873874-supplement-Suppl_figs_1-4.pdf]

### Supplementary Figure 1

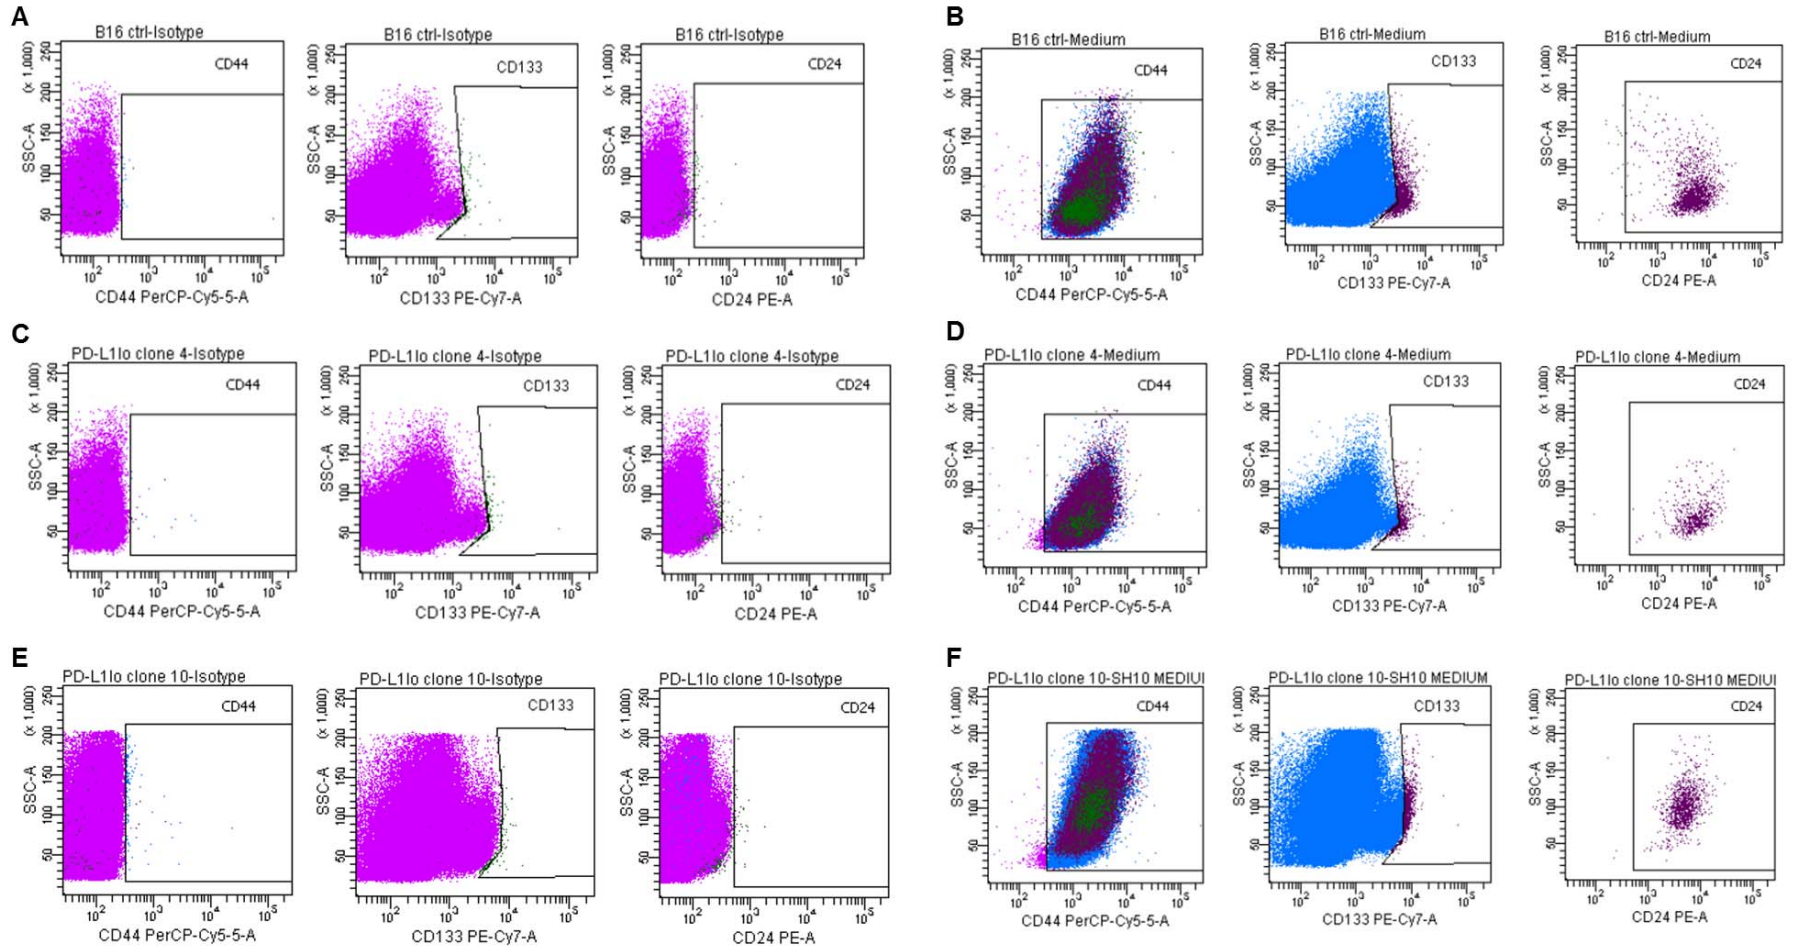

Supplementary Fig 1. Gating strategy for CD44<sup>+</sup>CD133<sup>+</sup>CD24<sup>+</sup> B16 tumor initiating cells (TIC). Cells were gated on CD44<sup>+</sup> gate. The positive cells were then gated for CD133 and then subsequently for CD24 positive population, considered as TIC. (A) Isotype controls for CD44, CD133, CD24, B16 control. (B) CD44, CD133, CD24 staining on B16 control cells. (C) Isotype controls for CD44, CD133, CD24, B16 PD-L1<sup>lo</sup> clone 4. (D) CD44, CD133, CD24 staining on B16 PD-L1<sup>lo</sup> clone 4 cells. (E) Isotype controls for CD44, CD133, CD24, B16 PD-L1<sup>lo</sup> clone 10. (F) CD44, CD133, CD24 staining on ID8agg PD-L1<sup>lo</sup> clone 10 cells.

### Supplementary Figure 2

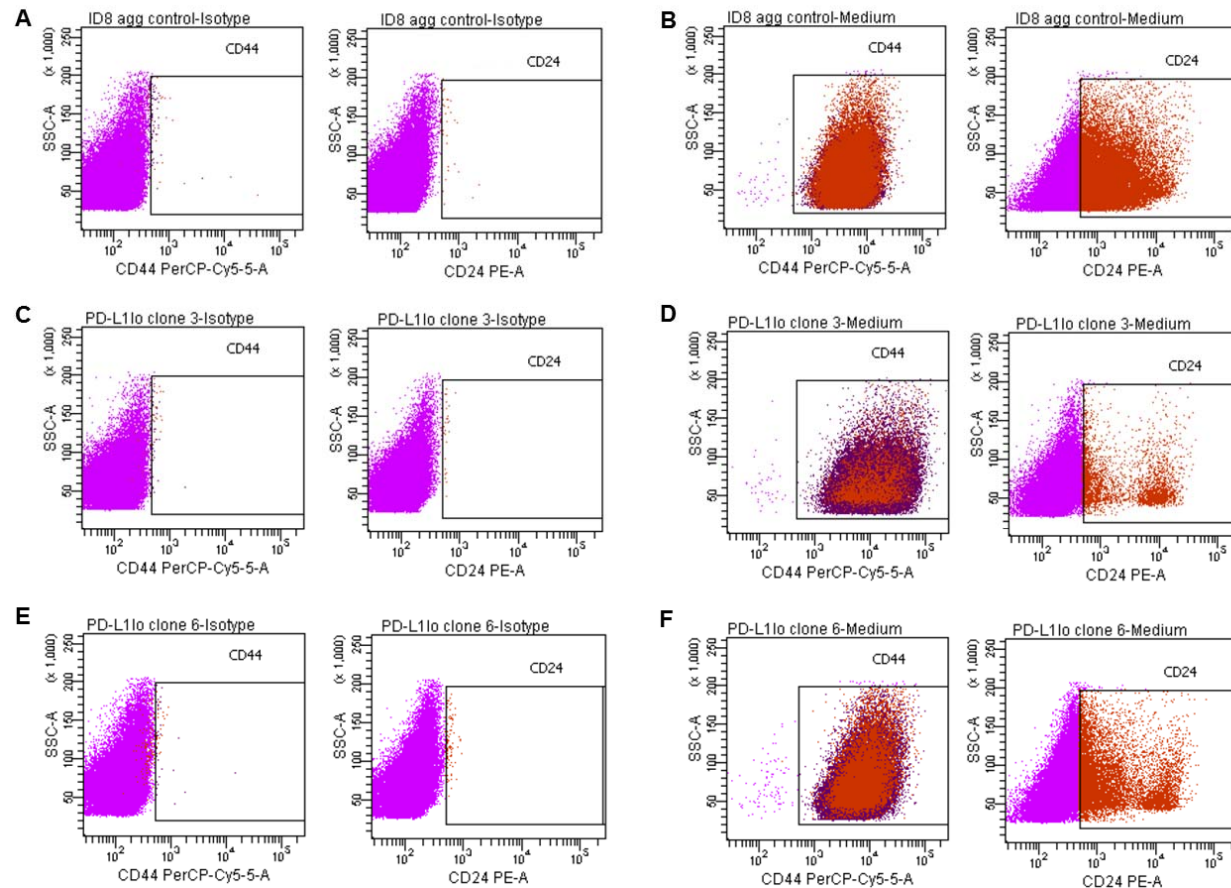

Supplementary Fig 2. Gating strategy for CD44<sup>+</sup>CD24<sup>+</sup> ID8agg tumor initiating cells (TIC). Cells were gated on CD44<sup>+</sup> gate. The positive cells were then gated for CD24 positive population, considered as TIC. (A) Isotype controls for CD44, CD24, ID8agg control. (B) CD44, CD24 staining on ID8agg control cells. (C) Isotype controls for CD44, CD24, ID8agg PD-L1<sup>lo</sup> clone 3. (D) CD44, CD24 staining on ID8agg PD-L1<sup>lo</sup> clone 3 cells. (E) Isotype controls for CD44, CD24, ID8agg PD-L1<sup>lo</sup> clone 6. (F) CD44, CD24 staining on ID8agg PD-L1<sup>lo</sup> clone 6 cells.

### Supplementary Figure 3

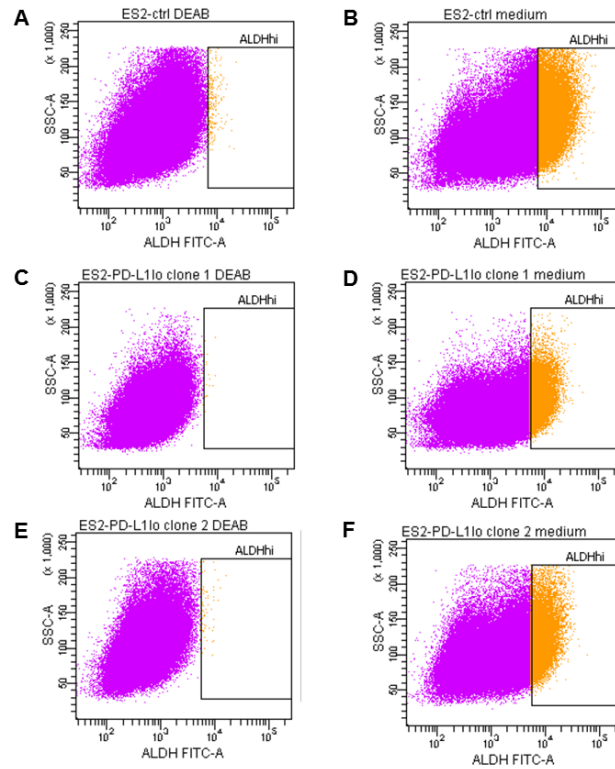

Supplementary Fig 3. Gating strategy for ES2 ALDH<sup>hi</sup> tumor initiating cells (TIC). Cells were treated with specific aldehyde dehydrogenase (ALDH) inhibitor diethylaminobenzaldehyde (DEAB), as negative control to set up the gate for ALDH<sup>hi</sup> cells, considered as TIC. (A) Negative control ES2 control. (B) ALDH<sup>hi</sup> ES2 control cells. (C) Negative control, ES2 PD-L1<sup>lo</sup> clone 1. (D) ALDH<sup>hi</sup> ES2 PD-L1<sup>lo</sup> clone 1 cells. (E) Negative control, ES2 PD-L1<sup>lo</sup> clone 2. (F) ALDH<sup>hi</sup> ES2 PD-L1<sup>lo</sup> clone 2 cells.

### Supplementary figure 4

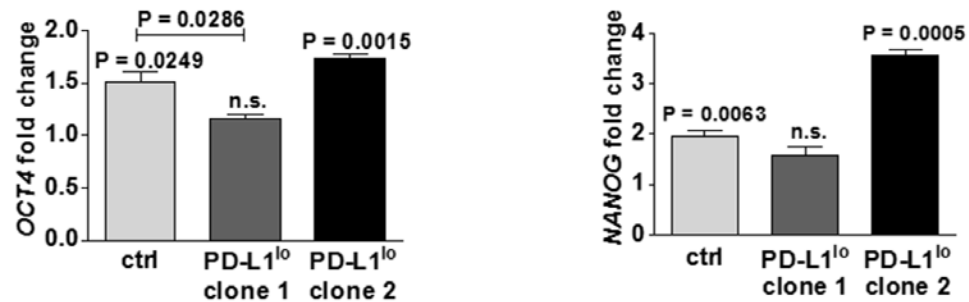

**Supplementary figure 4.** *OCT4* and *NANOG* expression by qPCR from ALDH<sup>hi</sup> TIC and total cultures. RNA was isolated from sorted tumor initiating cells (TIC) and total cultures. The ratio of gene expression in TIC versus total cultures is plotted as each bar. P values over each bar, unpaired *t* test from comparison of expression between TIC and total cells. Fold changes by  $\Delta\Delta\text{CT}$ . P value, unpaired *t* test. These fold changes were compared between control and PD-L1<sup>lo</sup> clones and P values calculated by unpaired *t* test over each line.
