# Supplementary material for: Tumor cell-intrinsic PD-L1 promotes tumor-initiating cell generation and functions in melanoma and ovarian cancer
Source: PubMed Central journal article supplement (PMC5547561; doi:10.1038/sigtrans.2016.30), 2016-12-23
Supplement: NIHMS873874-supplement-suppl_Table.pdf [file NIHMS873874-supplement-suppl_Table.pdf]

**Supplementary Table 1**

| <b>Gene</b>   | <b>Fold change<br/>(PD-L1<sup>lo</sup>/ctrl)</b> | <b>P value</b> |
|---------------|--------------------------------------------------|----------------|
| <i>cd24</i>   | 0.0670                                           | 1.39E-11       |
| <i>c-kit</i>  | 0.0158                                           | 3.03E-39       |
| <i>lin28a</i> | 0.1235                                           | 4.62E-18       |
| <i>nes</i>    | 0.3096                                           | 3.47E-15       |
| <i>ck18</i>   | 0.6185                                           | 1.10E-03       |

RNA-Seq data from the ID8agg and ID8agg PD-L1<sup>lo</sup> clone 3 total cells for ovarian cancer associated stemness genes. Fold changes were calculated as the ratio of expression in PD-L1<sup>lo</sup> cells compared to control cells.
